# Supplementary material for: Asymmetric triphenylamine–phenothiazine based small molecules with varying terminal acceptors for solution processed bulk-heterojunction organic solar cells
Source: Royal Society of Chemistry journal article supplement (doi:10.1039/c7cp08653a), 2018-01-01
Supplement: c7cp08653a1.pdf [file c7cp08653a1.pdf]

## Supporting Information

### Asymmetric triphenylamine –phenothiazine based small molecules with varying terminal acceptor for solution processed bulk heterojunction organic solar cells

Srikanth Revoju,<sup>\*a</sup> Subhayan Biswas,<sup>b</sup> Bertil Eliasson,<sup>a</sup> and Ganesh D. Sharma<sup>\*b</sup>

<sup>a</sup>Department of Chemistry, Umeå University, SE-90187 Umeå, Sweden

E-mail: srikanth.revoju@gmail.com

<sup>b</sup>Department of Physics, The LNMIIT (Deemed University), Jamdoli, Jaipur (Raj.) 302031, India

E-mail: gdsharma273@gmail.com

| <b>Table of contents</b>                                                          | <b>Page</b> |
|-----------------------------------------------------------------------------------|-------------|
| DFT data: Relative energies, dipole moments, HOMO/LUMO energies                   | 2           |
| TD-DFT calculations of electronic excitation energies                             | 3           |
| Proposed $\pi$ - $\pi$ -stacking with antiparallel alignment of the dipole moment | 4           |
| <sup>1</sup> H NMR and <sup>13</sup> C NMR of synthesized compounds               | 5-8         |
| HRMS of synthesized compounds                                                     | 9-12        |
| Current-voltage characteristics for as cast active layer OSC devices              | 13          |

**Table S1.** B3LYP/6-31G(d) geometry-optimized configurations and conformations of **M1**, **M2** and **M3**, with energy differences, dipole moments, and HOMO/LUMO energy levels.<sup>a</sup>

| Compound;<br>Configuration or<br>conformation |   | DFT-optimized geometry | $\Delta E$<br>(kJ mol <sup>-1</sup> ) | Dipole moment (D) |                          | HOMO/LUMO<br>(eV) |
|-----------------------------------------------|---|------------------------|---------------------------------------|-------------------|--------------------------|-------------------|
|                                               |   |                        |                                       | In vacuo          | PCM<br>$\epsilon = 4.81$ |                   |
| <b>M1</b>                                     | 1 |                        | 0                                     | 6.0               | 7.2                      | -4.97/-2.42       |
|                                               | 2 |                        | 0.5                                   | 6.7               |                          | -4.95/-2.39       |
|                                               | 3 |                        | 14.9                                  | 7.1               |                          |                   |
|                                               | 4 |                        | 15.9                                  | 7.2               |                          |                   |
| <b>M2</b>                                     | 1 |                        | 0                                     | 10.2              | 11.7                     | -5.08/-2.63       |
|                                               | 2 |                        | 1.4                                   | 10.4              |                          | -5.04/-2.60       |
| <b>M3</b>                                     | 1 |                        | 0                                     | 3.7               | 4.5                      | -4.93/-2.39       |
|                                               | 2 |                        | 1.0                                   | 3.2               |                          | -5.04/-2.60       |

<sup>a</sup> The DFT calculations were performed with an *N*-methyl group instead of the *N*-ethylhexyl group in the structures of **M1-M3**. The PCM calculations of dipole moments were done as single-point calculations on the lowest-energy structure of each compound **M1-M3**.

**Table S2.** Main characteristics of singlet-singlet electronic transitions obtained by TD-DFT calculations for the lowest-energy structure of SMs **M1**, **M2** and **M3**.<sup>a</sup>

|           | Excitation | Transitions                                                                                                                    | Wavelength (nm) | Energy (eV) | Oscillator strength |
|-----------|------------|--------------------------------------------------------------------------------------------------------------------------------|-----------------|-------------|---------------------|
| <b>M1</b> | 1          | 163 ->165 -0.10348<br>164 ->165 0.69637                                                                                        | 538.77          | 2.3012      | 0.2220              |
|           | 2          | 163 ->165 0.68480<br>164 ->165 0.11277                                                                                         | 468.06          | 2.6489      | 0.2415              |
|           | 3          | 160 ->165 -0.15976<br>162 ->165 0.61739<br>164 ->166 0.23607<br>164 ->167 -0.12176                                             | 372.15          | 3.3315      | 1.0371              |
|           | 4          | 160 ->165 0.11133<br>162 ->165 -0.22006<br>163 ->165 -0.10340<br>163 ->166 -0.14715<br>164 ->166 0.60873<br>164 ->167 -0.13780 | 354.04          | 3.5020      | 0.1778              |
| <b>M2</b> | 1          | 139 ->140 0.70182                                                                                                              | 564.56          | 2.1961      | 0.1442              |
|           | 2          | 138 ->140 0.68650                                                                                                              | 473.27          | 2.6197      | 0.1880              |
|           | 3          | 136 ->140 0.11033<br>137 ->140 0.54738<br>139 ->141 -0.40167                                                                   | 360.45          | 3.4397      | 0.6775              |
|           | 4          | 136 ->140 -0.10563<br>137 ->140 0.39790<br>139 ->141 0.54487                                                                   | 348.61          | 3.5566      | 0.2646              |
| <b>M3</b> | 1          | 159 ->161 -0.11709<br>160 ->161 0.69434                                                                                        | 546.01          | 2.2707      | 0.2715              |
|           | 2          | 159 ->161 0.68483<br>160 ->161 0.12495                                                                                         | 477.04          | 2.5991      | 0.2122              |
|           | 3          | 158 ->161 0.61156<br>160 ->163 -0.31091                                                                                        | 366.52          | 3.3827      | 0.7891              |
|           | 4          | 157 ->161 -0.17078<br>158 ->161 0.30111<br>160 ->163 0.59273                                                                   | 349.87          | 3.5437      | 0.2899              |
|           | 5          | 157 ->161 0.60845<br>159 ->163 -0.14830<br>159 ->164 -0.11002<br>160 ->163 0.13250<br>160 ->164 0.17048                        | 327.41          | 3.7868      | 0.4580              |

<sup>a</sup> The table has data for excitations with wavelength > 300 nm and oscillator strength > 0.1

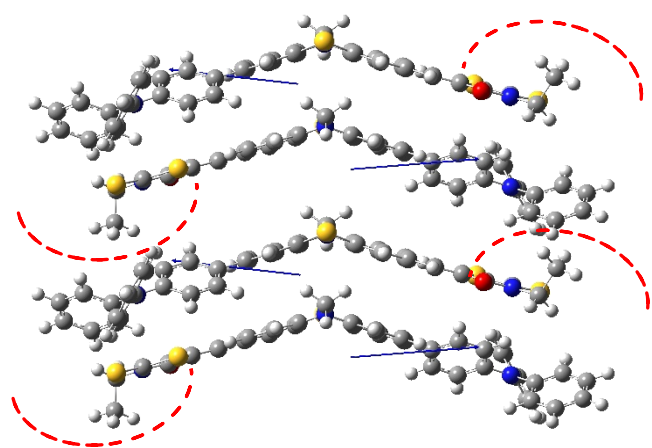

(a)

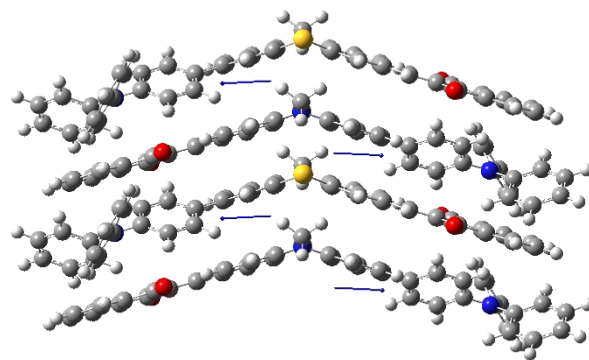

(b)

**Figure S1.** Proposed  $\pi$ - $\pi$ -stacking with antiparallel alignment of the individual molecules; (a) **M1**, where the *N*-ethyl group inhibits a tight stacking due to steric hindrance. (b) **M3**, where a steric hindrance such as that of **M1** does not exist.

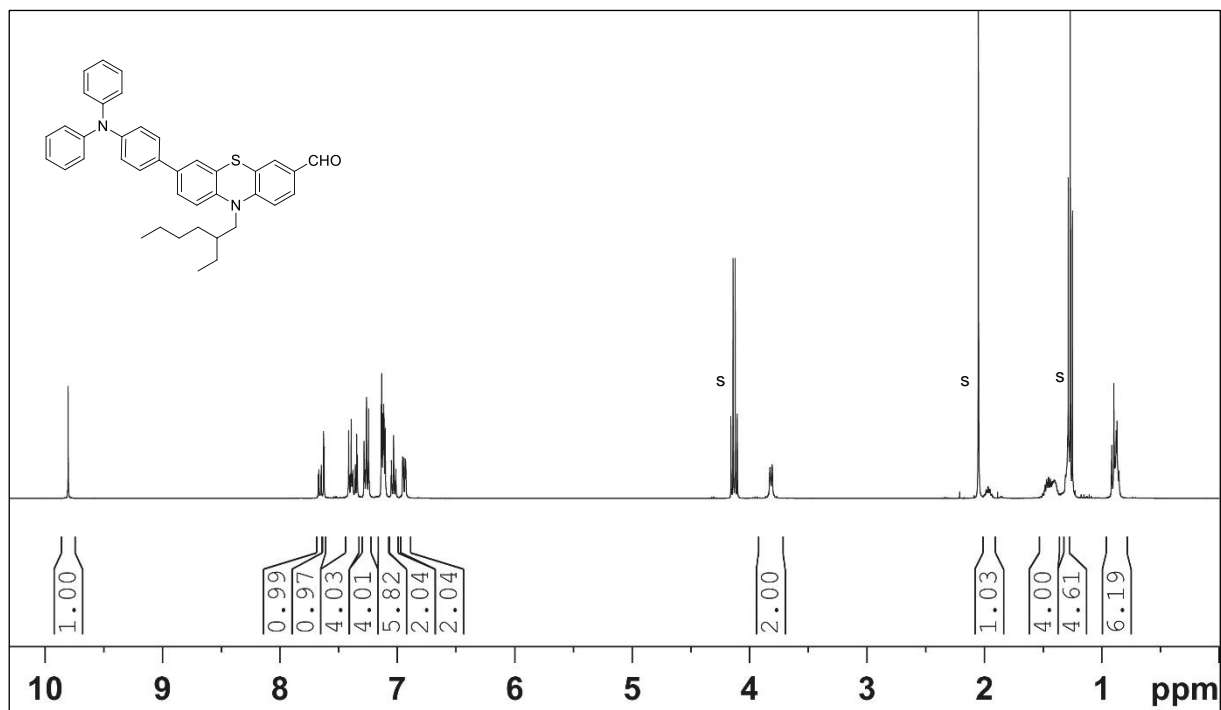

Figure S2.  $^1\text{H}$  NMR of compound 5.

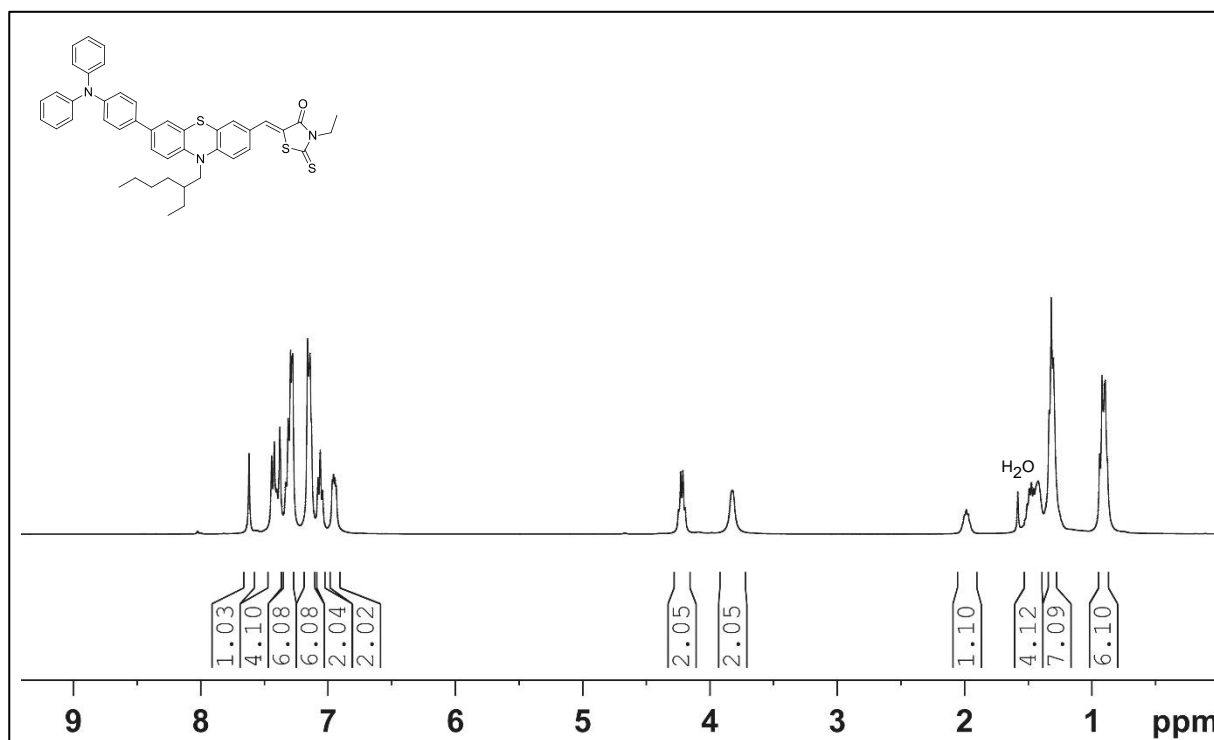

**Figure S3.** <sup>1</sup>H NMR of compound M1.

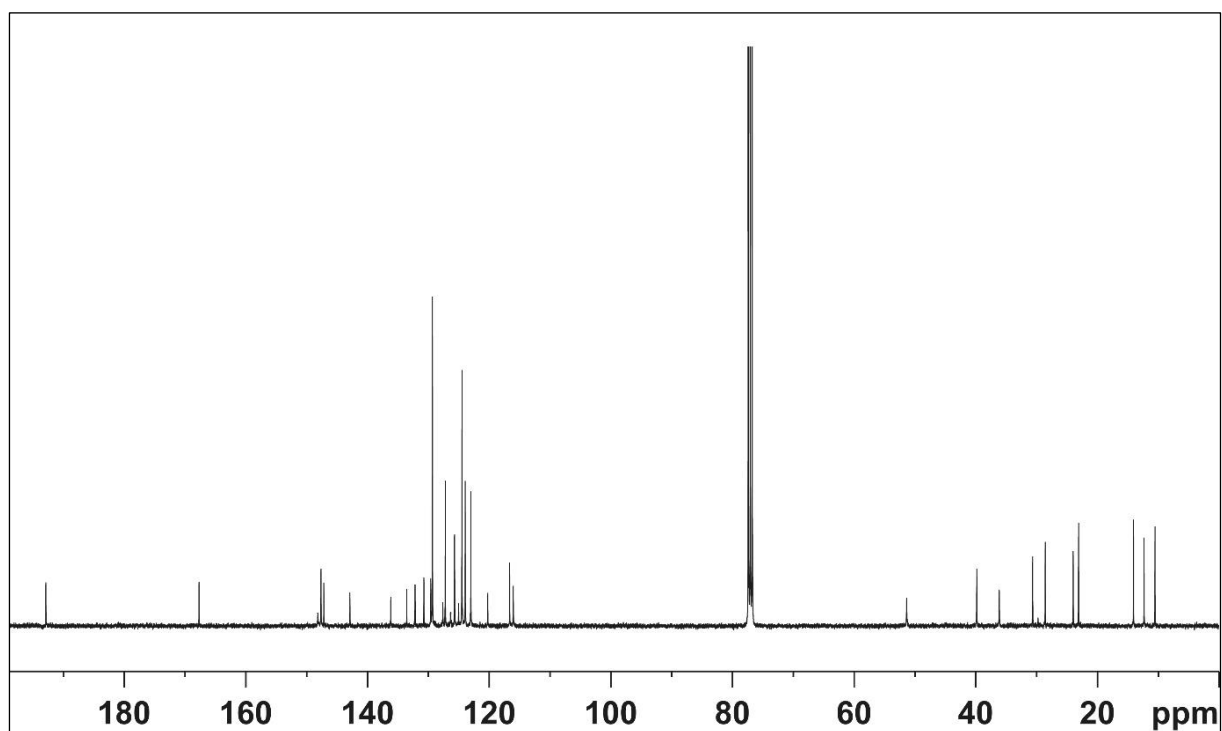

**Figure S4.** <sup>13</sup>C NMR of compound M1.

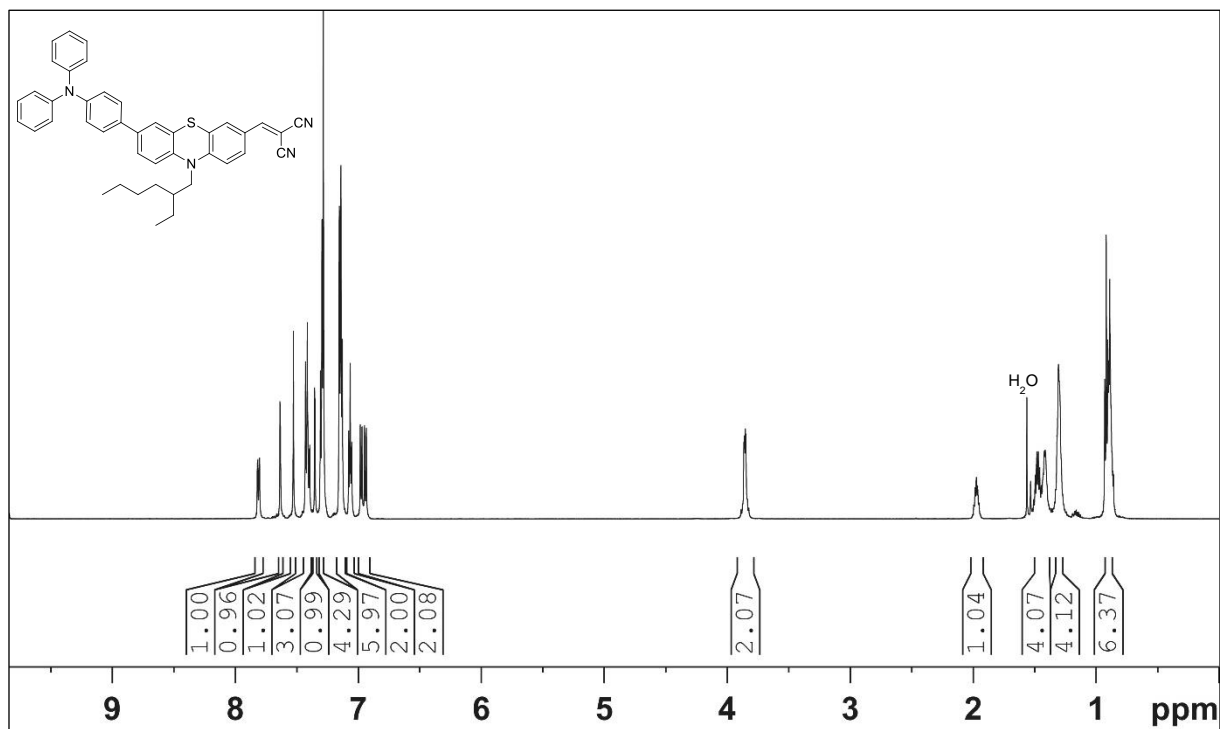

**Figure S5.** <sup>1</sup>H NMR of compound M2.

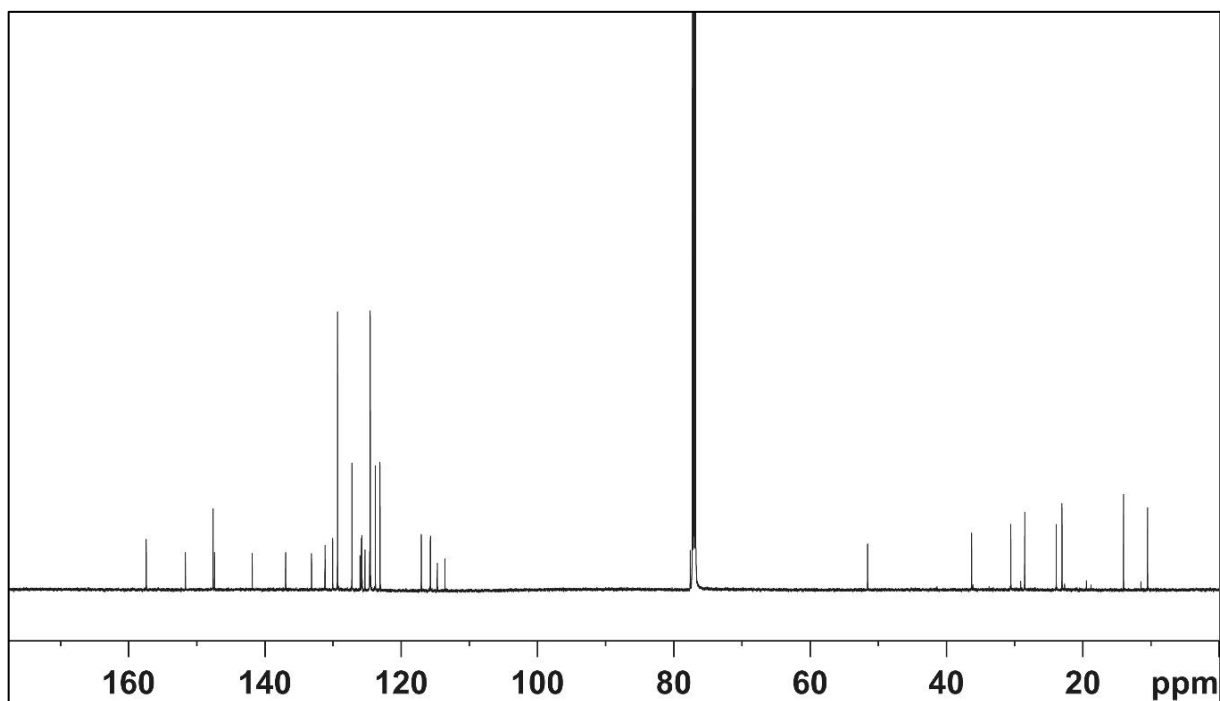

**Figure S6.** <sup>13</sup>C NMR of compound M2.

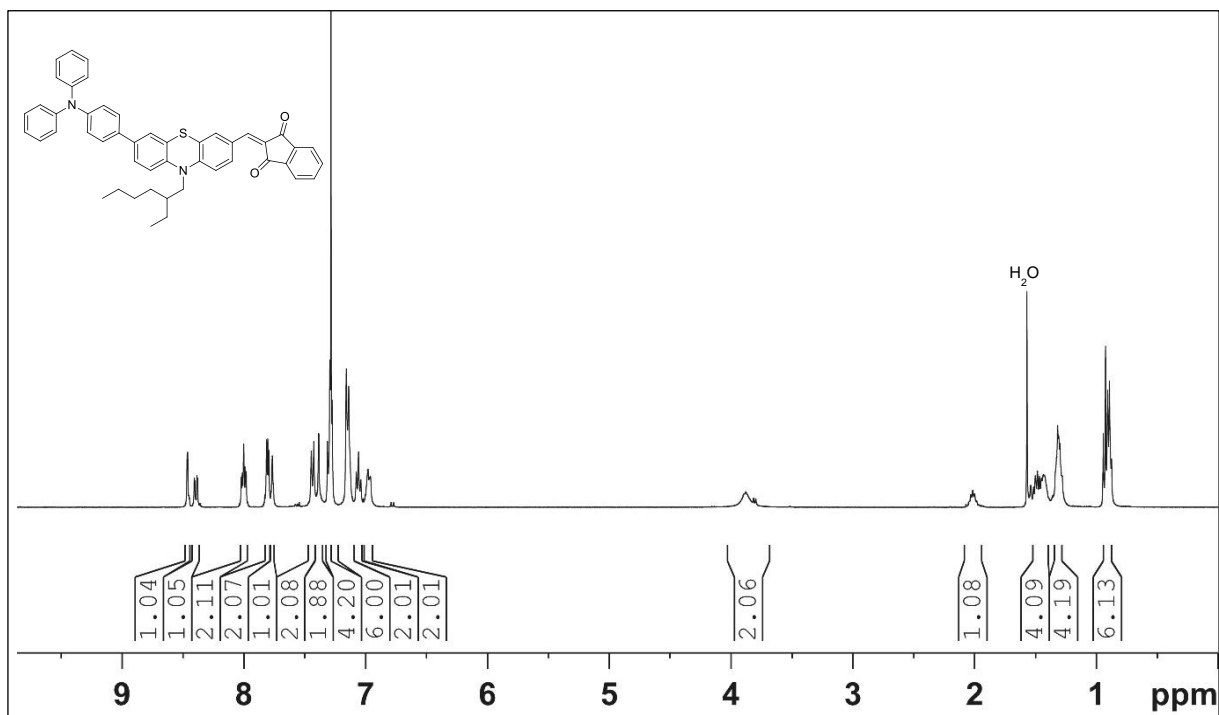

**Figure S7.**  $^1\text{H}$  NMR of compound M3.

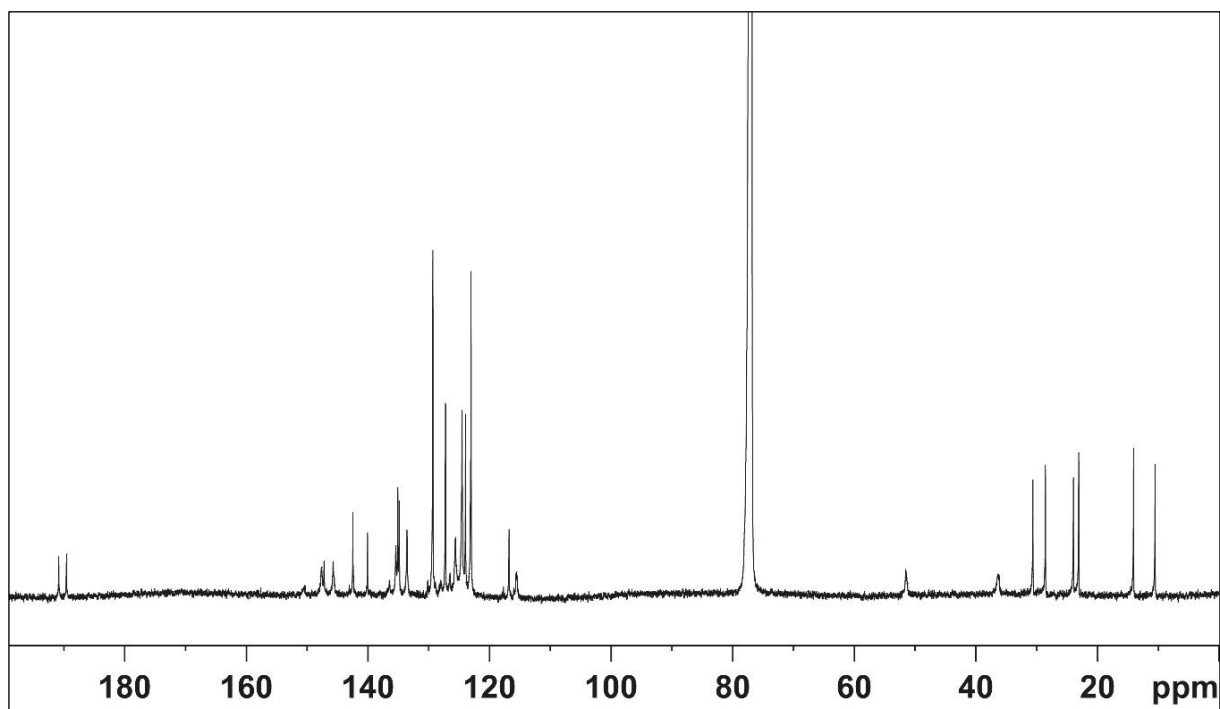

**Figure S8.**  $^{13}\text{C}$  NMR of compound M3.



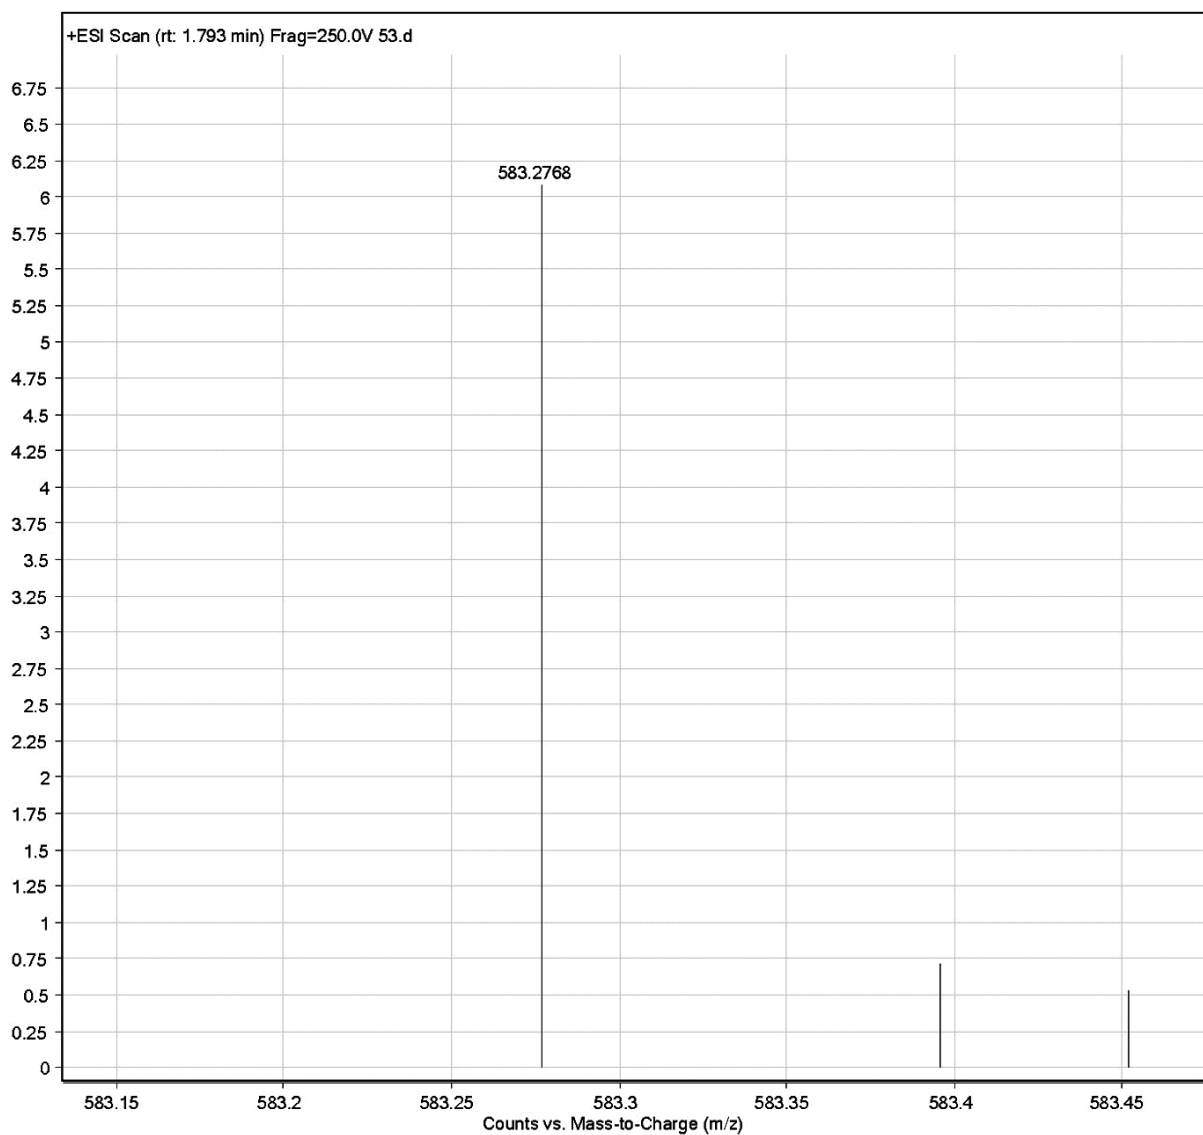

**Figure S9.** HRMS of compound **5**.

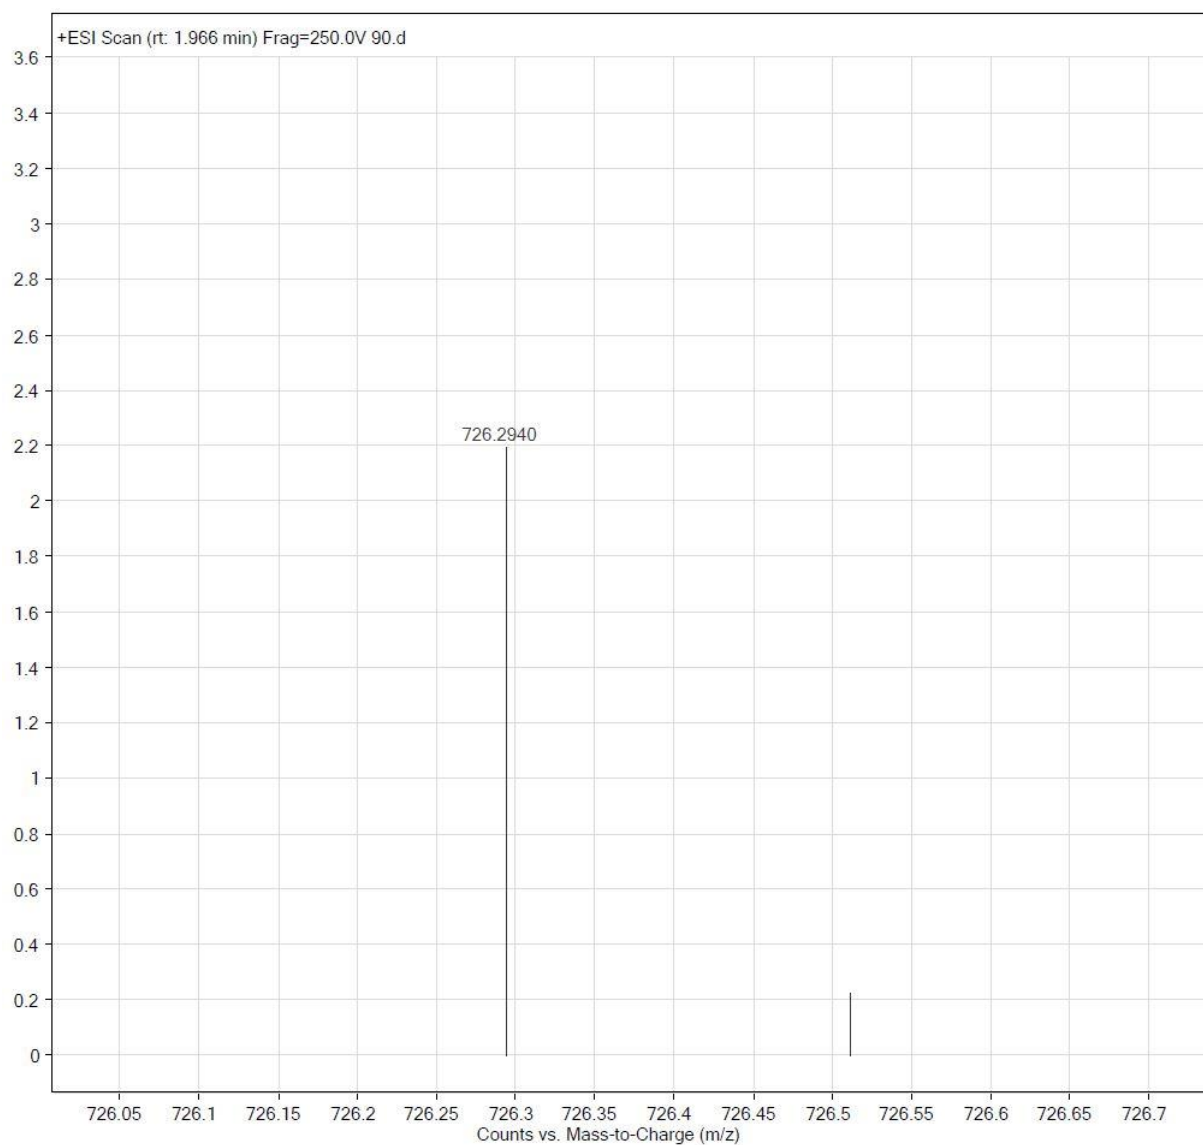

**Figure S10.** HRMS of compound **M1**.

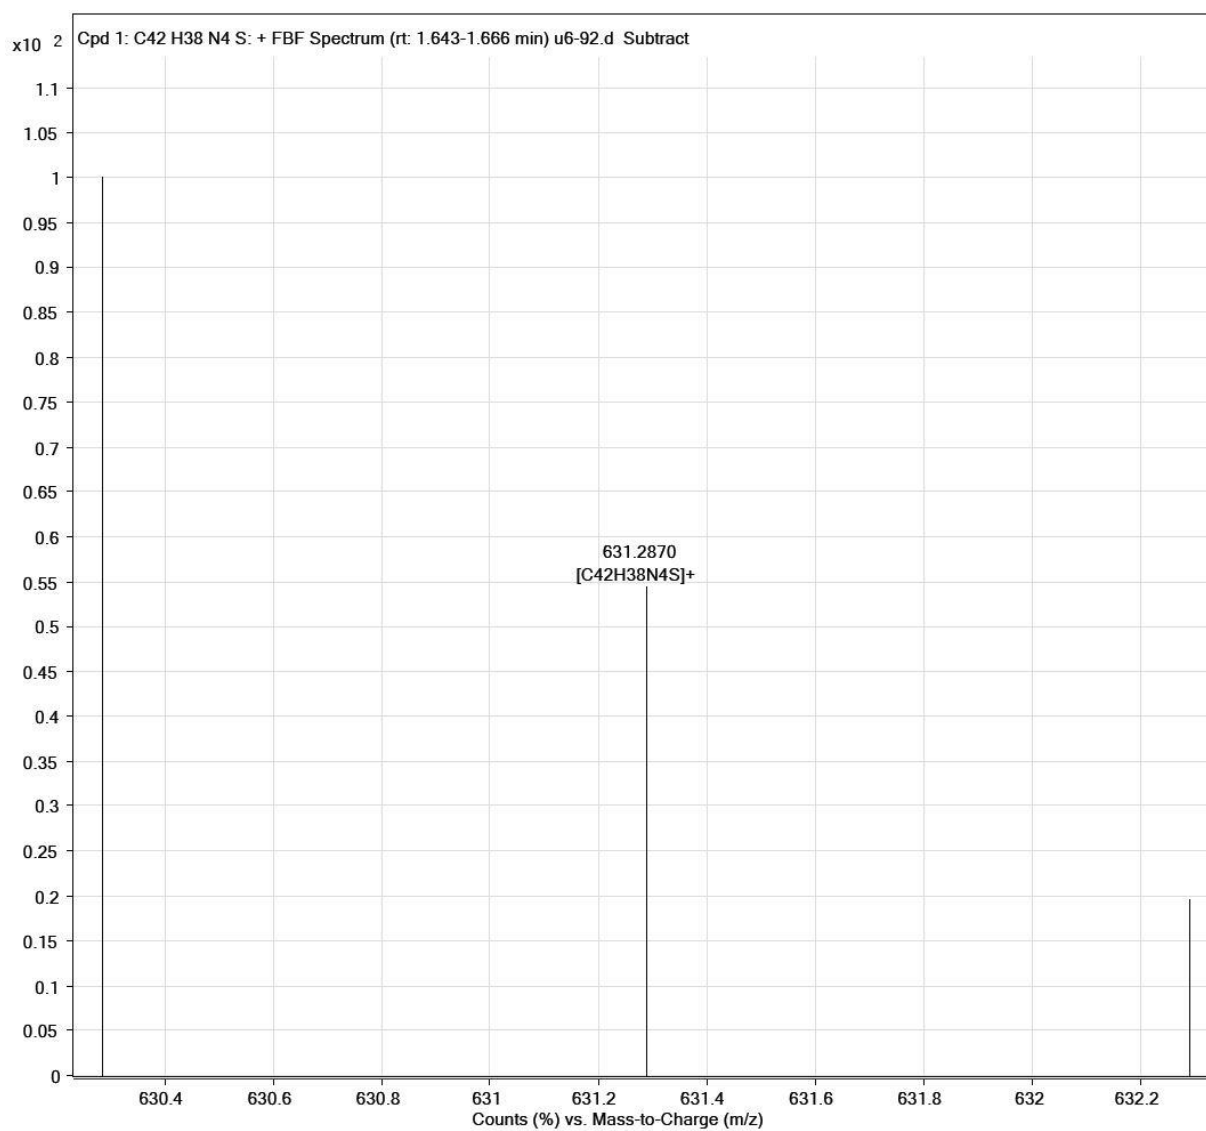

**Figure S11.** HRMS of compound M2.

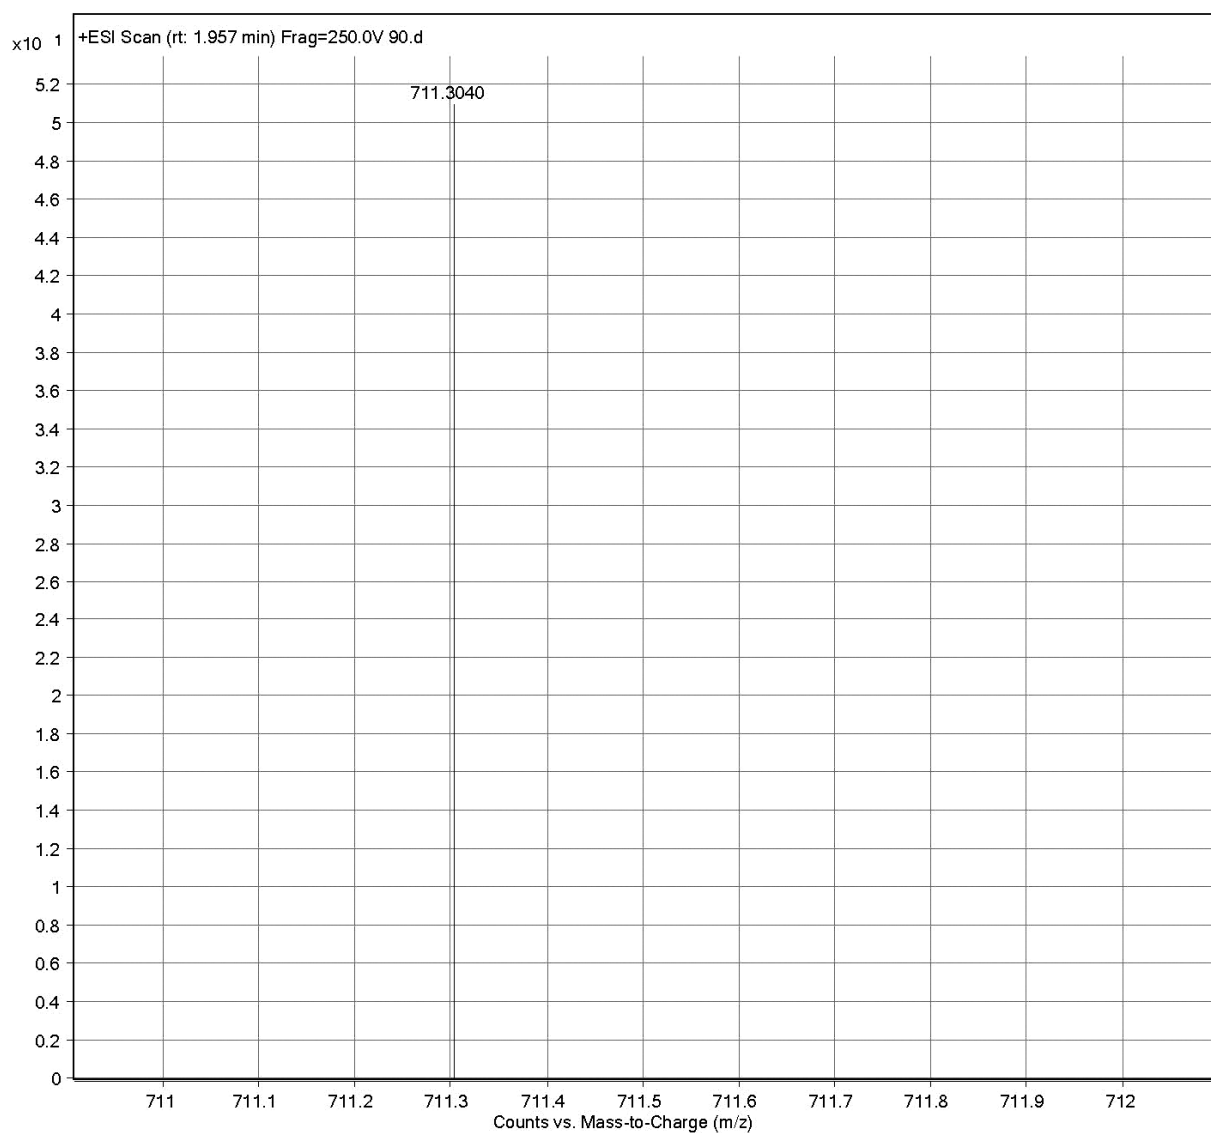

**Figure S12.** HRMS of compound **M3**.

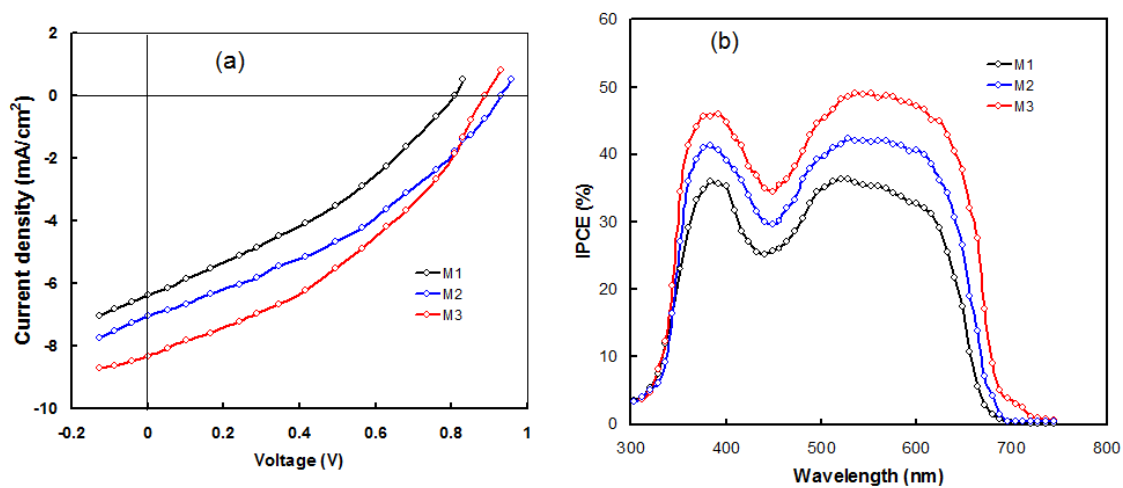

**Figure S13.** Current-voltage characteristics under illumination of OSCs based on as cast active layers.
